# Supplementary material for: Curcuminoids as EBV Lytic Activators for Adjuvant Treatment in EBV-Positive Carcinomas
Source: MDPI journal article supplement (doi:10.3390/cancers10040089), 2018-03-22
Supplement: s1 [file s1]

# Supplementary Materials: Curcuminoids as EBV lytic activators for adjuvant treatment in EBV-positive carcinomas

Octavia Ramayanti, Mitch Brinkkemper, Sandra A.W.M Verkuijlen, Leni Ritmaleni, Mei Lin Go, Jaap M. Middeldorp

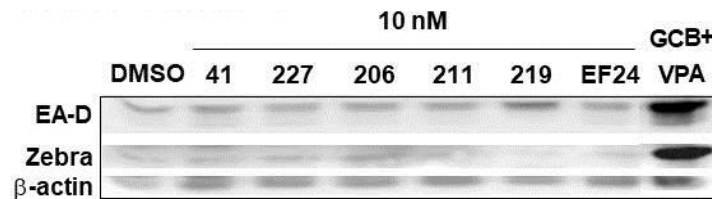

**Figure S1.** Curcuminoids induced weak EBV lytic reactivation at low (10 nM) concentrations.

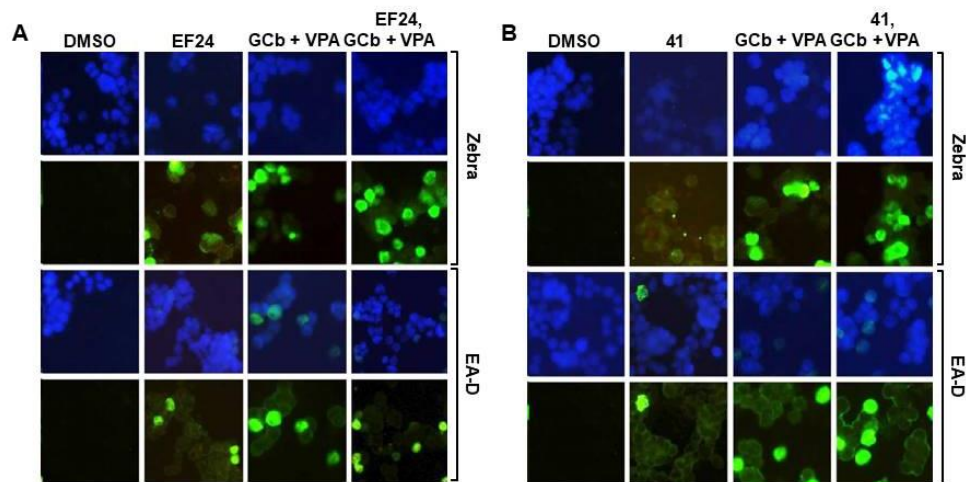

**Figure S2.** Representative immunofluorescence images of C666.1 cells treated by hit compounds (41, EF24) alone or in combination with GCb+VPA. (A). C666.1 expressed Zebra and EA-D lytic proteins upon EF24 treatment alone or in combination with GCb+VPA. (B). C666.1 expressed Zebra and EA-D lytic proteins upon 41 treatment alone or in combination with GCb+VPA. Increased number of cells expressing Zebra and EA-D lytic proteins upon co-treatment with EF24, GCb+VPA (left panel) or with 41, GCb+VPA (right panel) were shown.

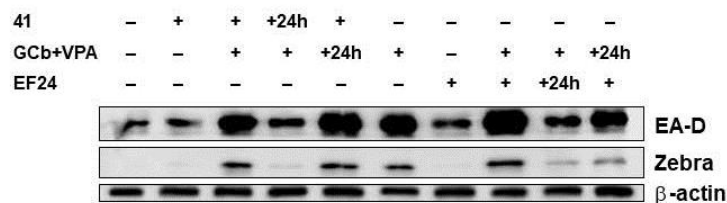

**Figure S3.** Pre-treatment with curcuminoid inhibits EBV lytic cycle induced by CLVA regimen. C666.1 cells were treated with hit compounds (41, EF24) 24 h before and after GCb+VPA administration. The cells were collected after 96 h followed by immunoblot detection of Zebra and EA-D proteins. Treatment with hit compounds or GCb+VPA alone for 96 h were included for comparison. When administered simultaneously with CLVA regimen, hit compounds (41, EF24) synergistically induced EBV reactivation. Curcuminoid antagonized the lytic induction effect of GCb+VPA when administered 24 h prior GCb+VPA treatment.

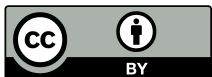

© 2018 by the authors; licensee MDPI, Basel, Switzerland. This article is an open access article distributed under the terms and conditions of the Creative Commons by Attribution (CC-BY) license (<http://creativecommons.org/licenses/by/4.0/>)
